# Supplementary material
Source: Springer Nature journal article supplement (https://www.springermedizin.de/resource/supplementary/13014_2010_338_MOESM4_ESM.pdf/9633398)

(a)

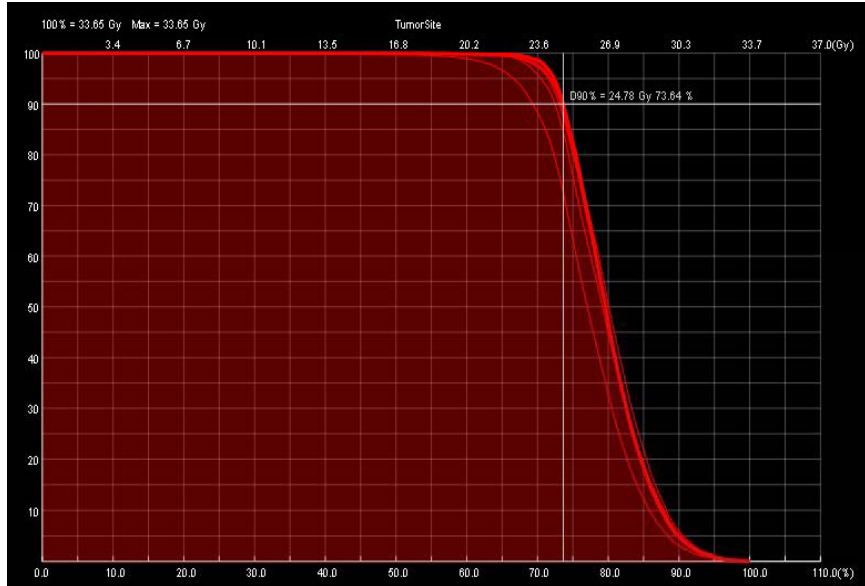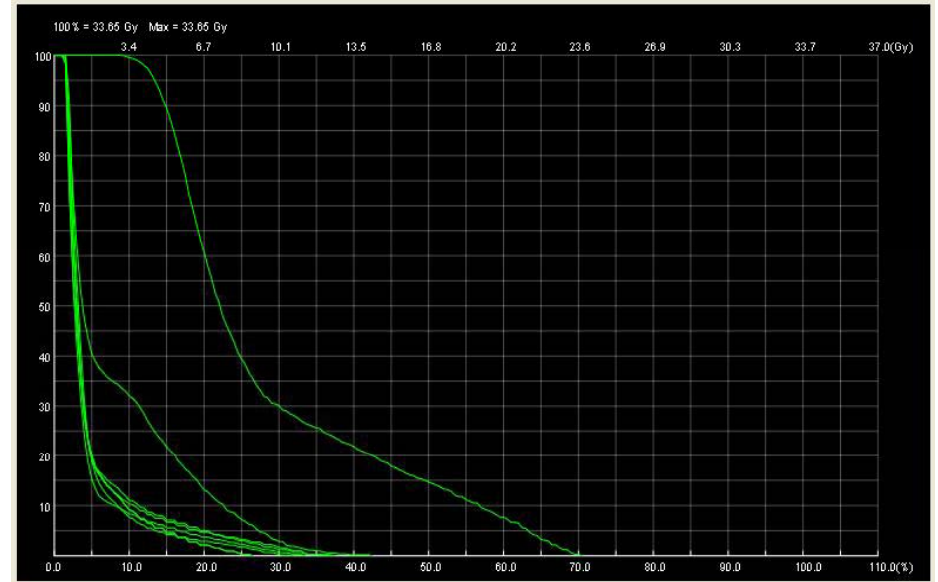

(b)

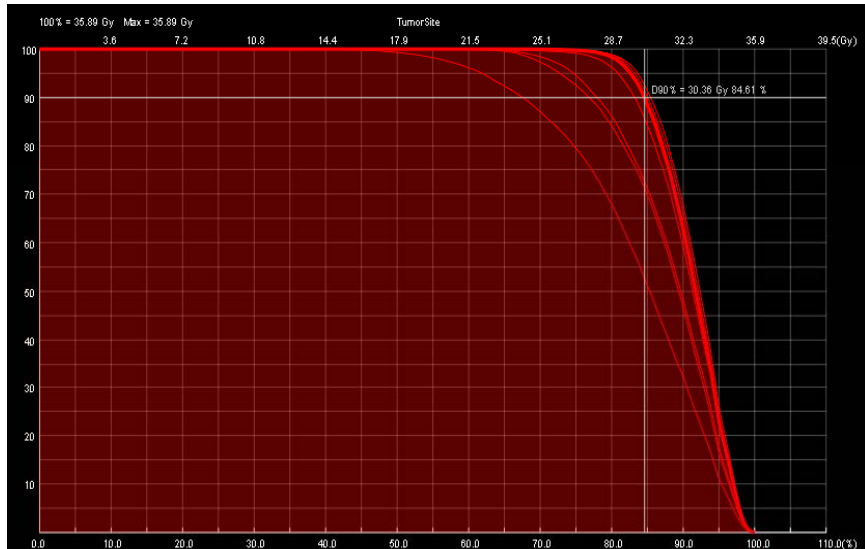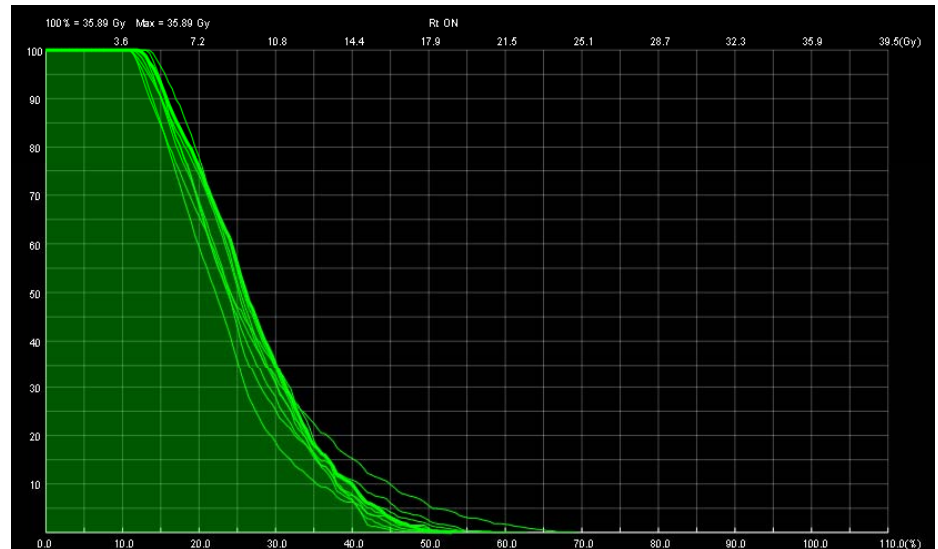

Supplement: MOESM4 [file 9633398]
